# Supplementary material for: Epidemiological Transition and Strategies for the Control of Hepatitis A in Serbia
Source: MDPI journal article supplement (doi:10.3390/v15030753), 2023-03-15
Supplement: s1 [file s1]

**Table S1. Proportion (%) of hepatitis A cases by age groups stratified by sex in Serbia (2002-2021)**

|            |               | Age groups (years) |      |       |       |       |       |       |       |     |
|------------|---------------|--------------------|------|-------|-------|-------|-------|-------|-------|-----|
| Sub-period | Sex           | <5                 | 5-9  | 10-14 | 15-19 | 20-29 | 30-39 | 40-49 | 50-59 | >60 |
| 2002-2006  | <b>Male</b>   | 4.6                | 12.2 | 14.5  | 13.2  | 20.6  | 16    | 10.9  | 5     | 3   |
|            | <b>Female</b> | 4.5                | 15.1 | 14.6  | 12.2  | 19.4  | 16.9  | 8.9   | 5.2   | 3.2 |
| 2007-2011  | <b>Male</b>   | 2.9                | 9.2  | 10.6  | 13.5  | 27.1  | 17.4  | 11.9  | 5.3   | 2.1 |
|            | <b>Female</b> | 4.5                | 12.4 | 11.5  | 11.5  | 23.3  | 16.9  | 11.7  | 5.4   | 2.8 |
| 2012-2016  | <b>Male</b>   | 3.3                | 10   | 12    | 13    | 20    | 14    | 14.3  | 8.7   | 4.7 |
|            | <b>Female</b> | 3                  | 11.2 | 10.8  | 11    | 19.6  | 17.6  | 12.2  | 10.6  | 4   |
| 2017-2021  | <b>Male</b>   | 1.5                | 7.1  | 10.7  | 6.6   | 20.5  | 18.5  | 16.3  | 11.7  | 7.1 |
|            | <b>Female</b> | 2.3                | 7.6  | 10.5  | 8.8   | 16.4  | 13.5  | 14    | 19.9  | 7   |

**Table S2.** Hospitalization status and classification of hepatitis A cases in Vojvodina, 2002-2021.

| Sub-period | Reported cases |      | Hospitalized cases |                | Outbreak cases |                | Number of cases per outbreak |                 |                 | Classification of outbreak cases |                 |                 |                 |                           |      |
|------------|----------------|------|--------------------|----------------|----------------|----------------|------------------------------|-----------------|-----------------|----------------------------------|-----------------|-----------------|-----------------|---------------------------|------|
|            | n              | %    | n                  | % <sup>1</sup> | n              | % <sup>2</sup> | Min                          | Max             | Mean            | Probable                         |                 | Confirmed       |                 | Unclassified <sup>3</sup> |      |
|            |                |      |                    |                |                |                |                              |                 |                 | n                                | %               | n               | %               | n                         | %    |
| 2002-2006  | 1333           | 49.4 | 691                | 51.8           | 902            | 67.7           | 3                            | 114             | 33              | NA <sup>4</sup>                  | NA <sup>4</sup> | NA <sup>4</sup> | NA <sup>3</sup> | 902                       | 100  |
| 2007-2011  | 1038           | 38.5 | 437                | 42.1           | 606            | 58.4           | 3                            | 115             | 11              | 369                              | 60.9            | 237             | 39.1            | 0                         | 0    |
| 2012-2016  | 263            | 9.8  | 132                | 50.2           | 137            | 52.1           | 3                            | 78              | 8               | 59                               | 43.1            | 78              | 56.9            | 0                         | 0    |
| 2017-2021  | 62             | 2.3  | 19                 | 30.6           | 17             | 27.4           | NA <sup>5</sup>              | NA <sup>5</sup> | NA <sup>5</sup> | 0                                | 0               | 17              | 100             | 0                         | 0    |
| Total      | 2696           | 100  | 1279               | 47.4           | 1662           | 61.6           | 3                            | 115             | 17.3            | 428                              | 25.8            | 332             | 19.9            | 902                       | 54.3 |

<sup>1</sup> The proportion of hospitalized patients in the total number of reported hepatitis A cases in each subperiod.

<sup>2</sup> The proportion of outbreak cases in the total number of reported hepatitis A cases in each subperiod.

<sup>3</sup> Case classifications were conducted starting from 2007; EU case definition was applied from 2017.

<sup>4</sup> Not applicable due to different case classification in the period 2002-2006 (hepatitis A was diagnosed based on the exclusion of hepatitis B and hepatitis C).

<sup>5</sup> Not applicable: only one outbreak of hepatitis A was reported (17 cases) in the period 2017-2021.

**Table S3.** Affected population groups and settings of hepatitis A outbreaks in Vojvodina, 2002-2021.

| Sub-period | Reported outbreaks |      | Outbreak settings or affected population groups |      |                       |     |                      |      |                                   |     |                   |      |
|------------|--------------------|------|-------------------------------------------------|------|-----------------------|-----|----------------------|------|-----------------------------------|-----|-------------------|------|
|            |                    |      | General population <sup>1</sup>                 |      | Hospital <sup>1</sup> |     | Schools <sup>1</sup> |      | Immigrants, refugees <sup>1</sup> |     | Roma <sup>1</sup> |      |
|            | n                  | %    | n                                               | %    | n                     | %   | n                    | %    | n                                 | %   | n                 | %    |
| 2002-2006  | 33                 | 41.8 | 18                                              | 54.5 | 2                     | 6.1 | 7                    | 21.2 | 1                                 | 3.0 | 5                 | 15.2 |
| 2007-2011  | 32                 | 40.5 | 24                                              | 75.0 | 0                     | 0   | 4                    | 12.5 | 0                                 | 0   | 4                 | 12.5 |
| 2012-2016  | 13                 | 16.5 | 12                                              | 92.3 | 0                     | 0   | 0                    | 0    | 1                                 | 7.7 | 0                 | 0    |
| 2017-2021  | 1                  | 1.2  | 1                                               | 100  | 0                     | 0   | 0                    | 0    | 0                                 | 0   | 0                 | 0    |
| Total      | 79                 | 100  | 55                                              | 69.6 | 2                     | 2.5 | 11                   | 14.0 | 2                                 | 2.5 | 9                 | 11.4 |

<sup>1</sup> The number and share (%) of outbreaks in relation to the total number of hepatitis A outbreaks in the corresponding subperiod.
